# Supplementary material for: New approach of blending polymeric ionic liquid with polybenzimidazole (PBI) for enhancing physical and electrochemical properties
Source: Royal Society of Chemistry journal article supplement (doi:10.1039/c4ta02184c), 2014-06-30
Supplement: c4ta02184c1.pdf [file c4ta02184c1.pdf]

## Supporting Information

# New Approach of Blending Polymeric Ionic Liquid with Polybenzimidazole (PBI) for Enhancing Physical and Electrochemical Properties

Anita S. Rewar, Harshal D. Chaudhari, Rajith Illathvalappil, K. Sreekumar\* and Ulhas K. Kharul\*

Polymer Science and Engineering Division, CSIR-National Chemical Laboratory,  
Dr. Homi Bhabha Road, Pune- 411008, INDIA  
Fax: +91-20-25902618 ; Tel: +91-20-25902180  
E-mail: [uk.kharul@ncl.res](mailto:uk.kharul@ncl.res), [k.sreekumarl@ncl.res](mailto:k.sreekumarl@ncl.res)

### 1. Synthesis of polybenzimidazole (PBI) and polymeric ionic liquid (PIL)

Polybenzimidazole was synthesized by polycondensation reaction of DAB and isophthalic acid, (PBI-I) as reported earlier [SCK JMS 2006] (Scheme S1a). A three-necked flask equipped with a mechanical stirrer, N<sub>2</sub> inlet and CaCl<sub>2</sub> drying tube was charged with 300 g of PPA, 10 g (0.04667 mol) of DAB and temperature was elevated to 140 °C. After dissolution of DAB, 0.04667 mol of isophthalic acid was added; temperature was slowly raised to 170 °C and maintained for 5 h under constant flow of N<sub>2</sub>. The temperature was further raised to 210 °C and maintained for 12 h. The polymer was obtained by precipitation in water. It was crushed, thoroughly washed with water, kept in 10% NaHCO<sub>3</sub> for 16 h; followed by water wash until filtrate was neutral to pH. The polymer was then soaked in acetone for 16 h, filtered and dried in vacuum oven at 100 °C for 7 days. Further purification by dissolving in DMAc (3% w/v) and reprecipitation in water yielded yellow colored fibrous polymer.

The PIL, viz., P[DADMA][TFMS] was prepared by anion exchange of a commercially available polymer, P[DADMA][Cl] (Scheme S1b). The 8% (w/v) solution of P[DADMA][Cl] was prepared in water and an equimolar quantity of Ag salt of trifluoromethanesulphonate was added to the solution while stirring at ambient. As the replacement of Cl<sup>-</sup> with the anion progressed, AgCl precipitated out. In view of polymeric nature of the cation, stirring continued for 24 h in order to ensure maximum possible exchange. The resulting mixture was centrifuged at 12000 rpm for 30 min to separate AgCl in precipitate form. To remove silver salt, centrifugation was repeated 5 times. In order to recover the product polymer, supernatant solution was poured on to a flat teflon surface and dried at 60 °C for 24 h and finally in vacuum oven at 60 °C for 7 days. The chloride

remained in the formed PIL was estimated by Volhard's method<sup>25</sup>, in which 0.1 g of PIL was stirred in 20 ml of 0.01 M AgNO<sub>3</sub> solution for 24 h. Excess of unreacted AgNO<sub>3</sub> was titrated with 0.01 M KSCN, in order to assess chloride content in PIL.

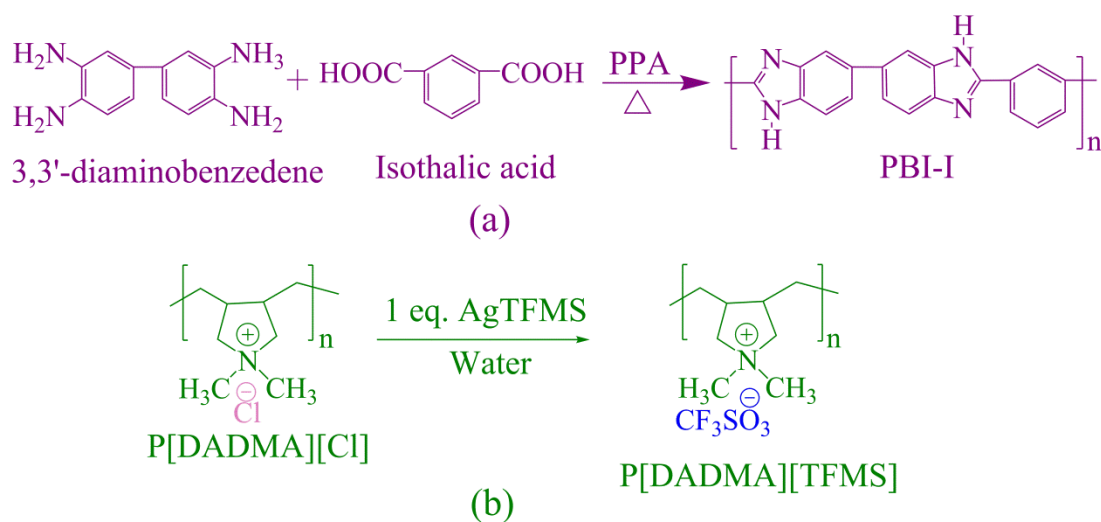

**Scheme S1. Synthesis of (a) polybenzimidazoles and (b) P[DADMA][TFMS].**

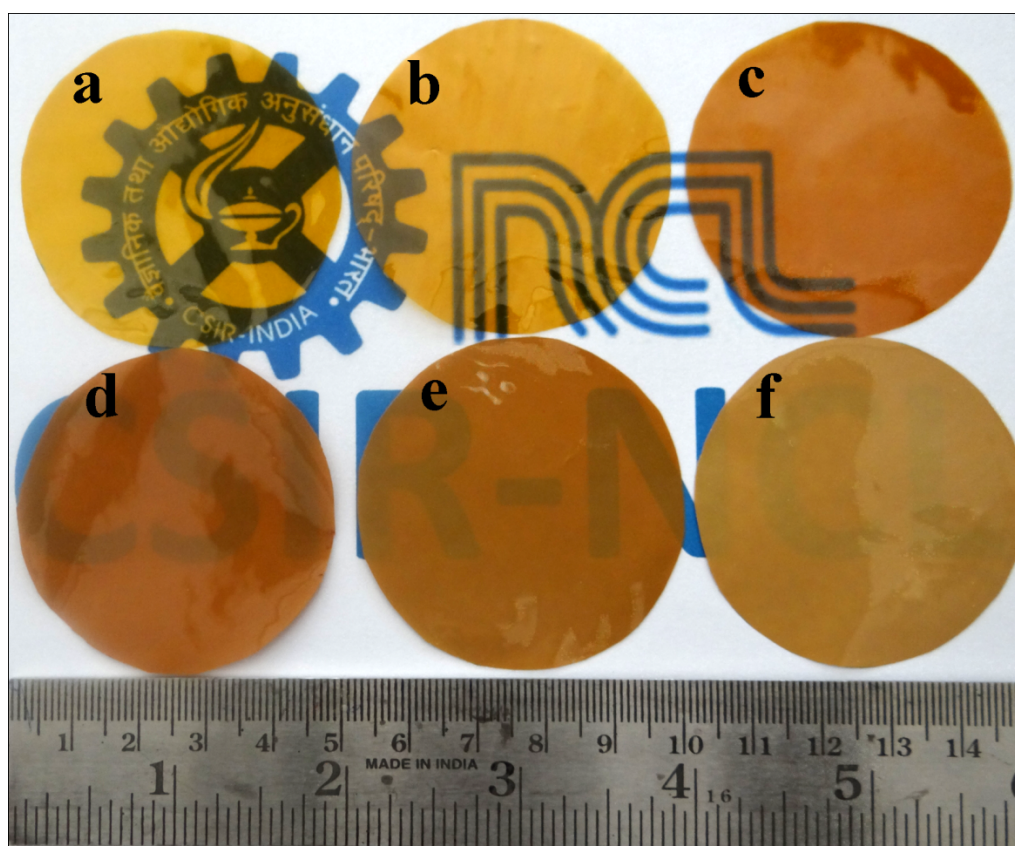

**Fig S1. Photographs of PBI-PIL blend membranes (a) PBI, (b) PBI-PIL<sub>5</sub>, (c) PBI-PIL<sub>15</sub>, (d) PBI-PIL<sub>25</sub> (e) PBI-PIL<sub>35</sub>, (f) PBI-PIL<sub>45</sub>.**

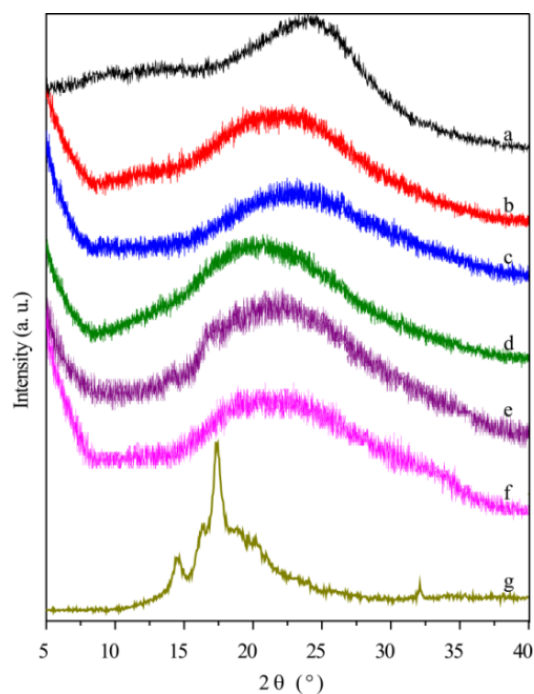

**Fig. S2.** WAXD pattern of PBI-PIL blend membranes (a) PBI, (b) PBI-PIL<sub>5</sub>, (c) PBI-PIL<sub>15</sub>, (d) PBI-PIL<sub>25</sub> (e) PBI-PIL<sub>35</sub>, (f) PBI-PIL<sub>45</sub>, (g) PIL.

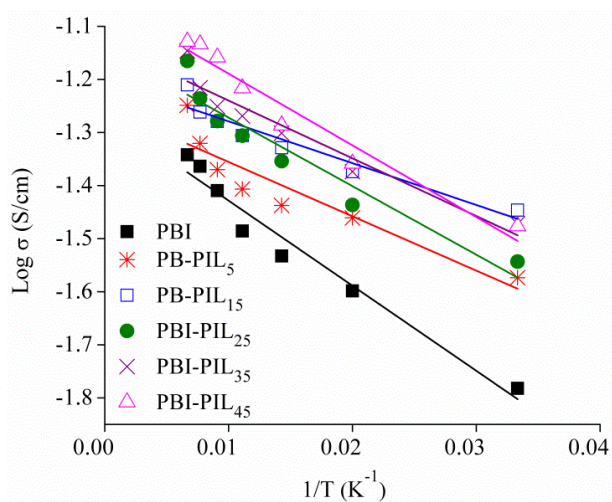

**Fig. S3.** Proton conductivity of PBI-PIL blends membrane at different temperatures.

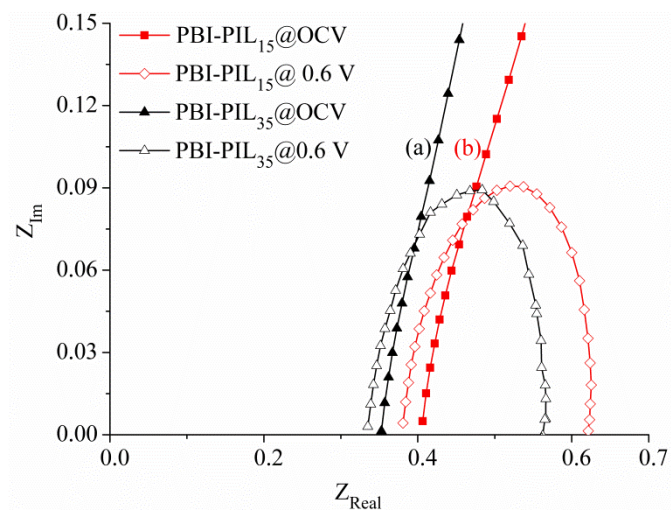

**Fig. S4.** MEA impedance curve of PBI-PIL<sub>35</sub> and PBI-PIL<sub>15</sub> blend membranes.

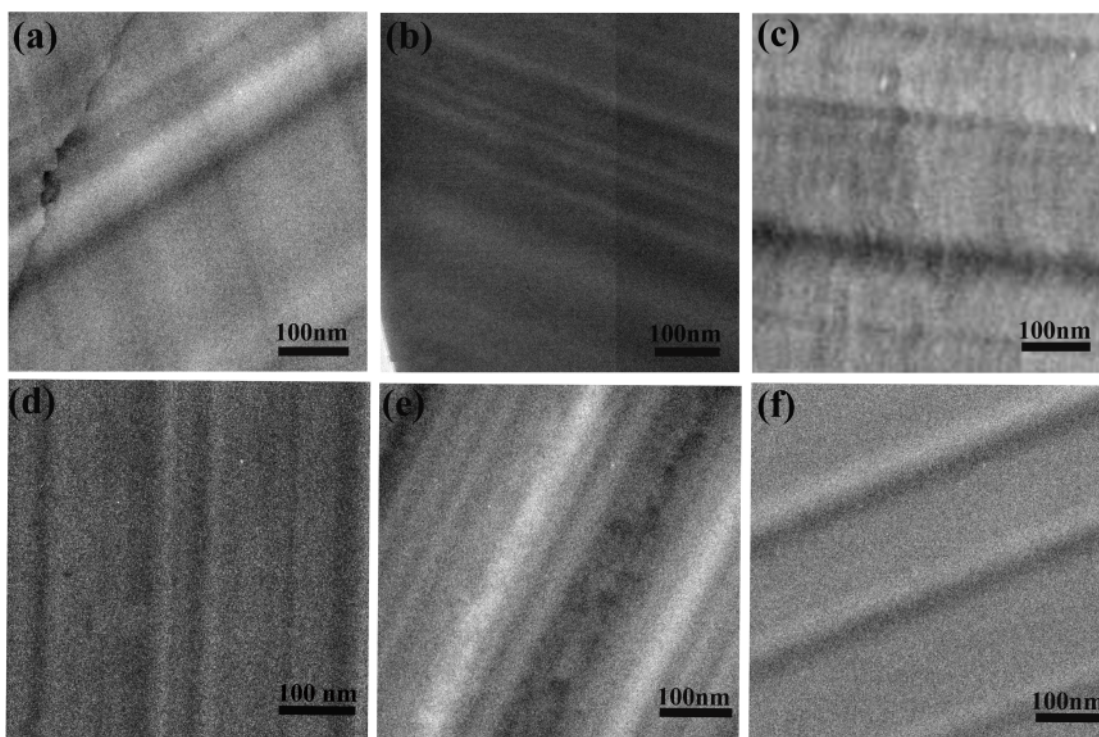

**Fig. S5.** TEM images of PBI-PIL blend membranes (a) PBI, (b) PBI-PIL<sub>5</sub>, (c) PBI-PIL<sub>15</sub>, (d) PBI-PIL<sub>25</sub>, (e) PBI-PIL<sub>35</sub>, (f) PBI-PIL<sub>45</sub>. These figures do not show inhomogeneity in any of the blend composition. This further supports homogeneous blend formation.
